# Supplementary material for: Lamellar–cubic transition of a dihydrazide derivative and its effect on the gel stability
Source: Royal Society of Chemistry journal article supplement (doi:10.1039/c8sm00227d), 2018-01-01
Supplement: c8sm00227d1.pdf [file c8sm00227d1.pdf]

## Supporting information

### Lamellar-cubic transition of a dihydrazide derivative and its effect on the gel stability

Xiangyang Che,<sup>a</sup> Chunling Zhang,<sup>a</sup> Binglian Bai,<sup>a,b</sup> Tianren zhang,<sup>a</sup> Chunxue Zhang,<sup>a</sup> Haitao Wang,<sup>a</sup> and Min Li<sup>a\*</sup>

<sup>a</sup> *Key Laboratory of Automobile Materials, Ministry of Education, Institute of Materials Science and Engineering, Jilin University, Changchun 130012, People's Republic of China.*

<sup>b</sup> *College of Physics, Jilin University, Changchun 130012, PR China.*

\* *Corresponding author: E-mail: minli@mail.jlu.edu.cn*

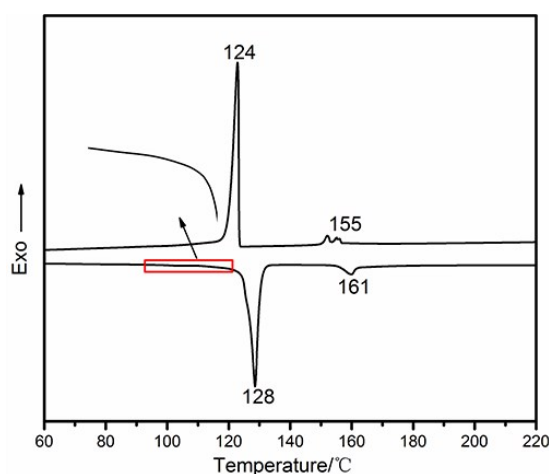

**Fig. S1** DSC curves of 4D<sub>16</sub> xerogel from cyclohexane (15 mg/mL, 20 °C) during second heating and cooling cycles with the heating rate of 10 °C/min.

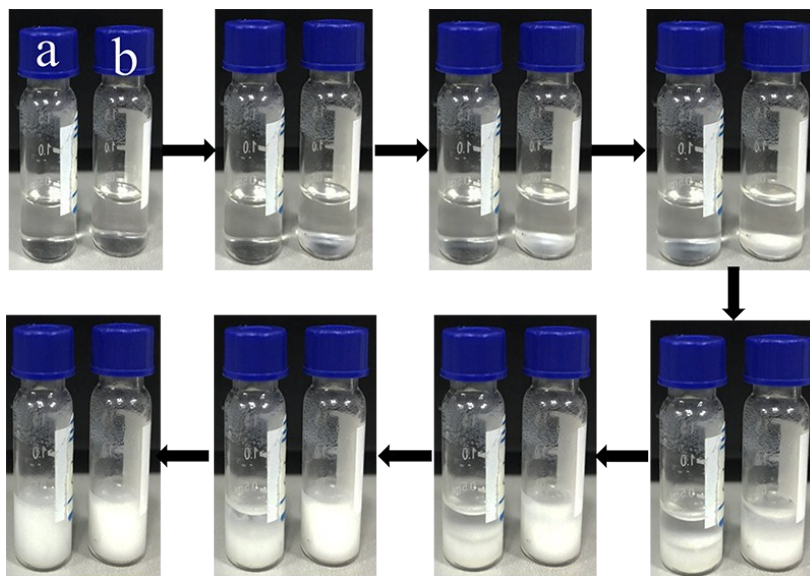

**Fig. S2** Photos of gelation process of 4D<sub>16</sub> at 20 °C in cyclohexane with the concentration of (a) 10 mg/mL, (b) 15 mg/mL.

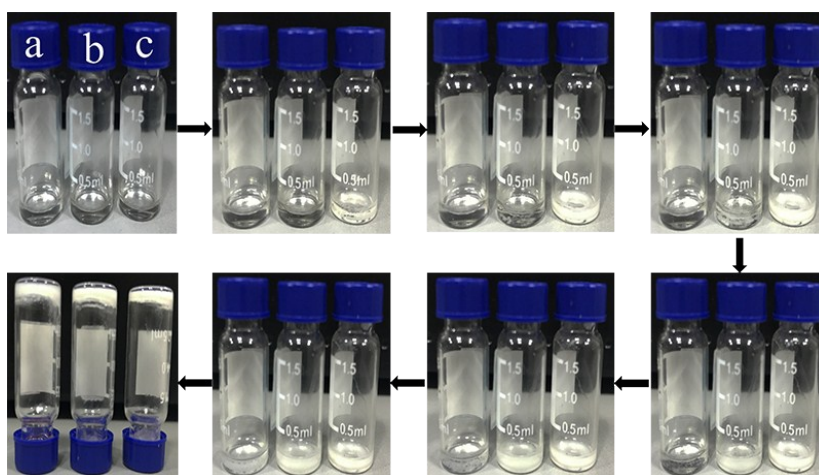

**Fig. S3** Photos of gelation process of 4D<sub>16</sub> at 20 °C in benzene with the concentration of (a) 26 mg/mL, (b) 40 mg/mL, (c) 60 mg/mL.

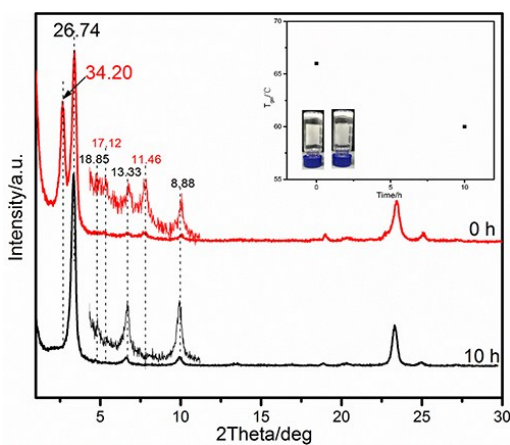

**Fig. S4** XRD patterns of 4D<sub>16</sub> xerogels obtained from benzene (40 mg/mL, 20 °C) after different annealing time at 58 °C. Inset graph was the plots of gel-sol phase transition temperature ( $T_{gel}$ ) of 4D<sub>16</sub> gels formed in benzene (40 mg/mL, 20 °C) annealed at 58 °C for different time period.

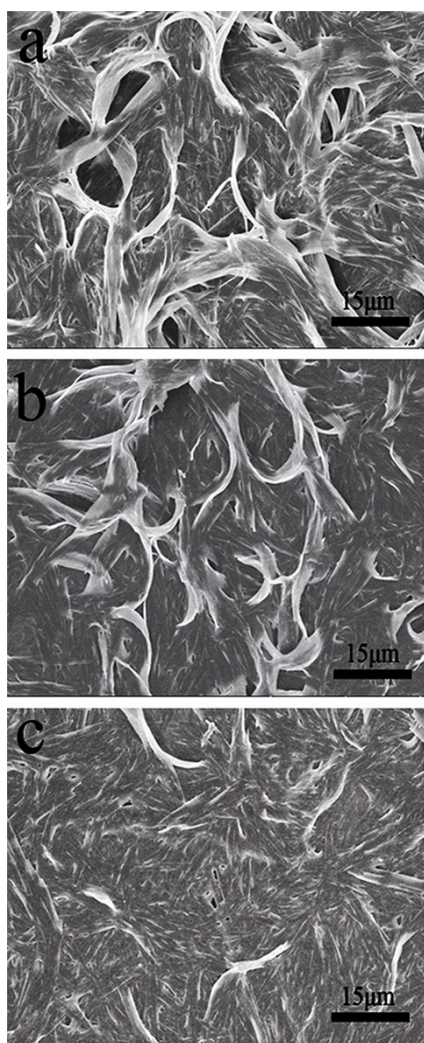

**Fig. S5** SEM images of 4D<sub>16</sub> xerogels obtained from cyclohexane (15 mg/mL, 20 °C) after different annealing time at 52 °C: (a) 0 h, (b) 110 h, (c) 260 h.

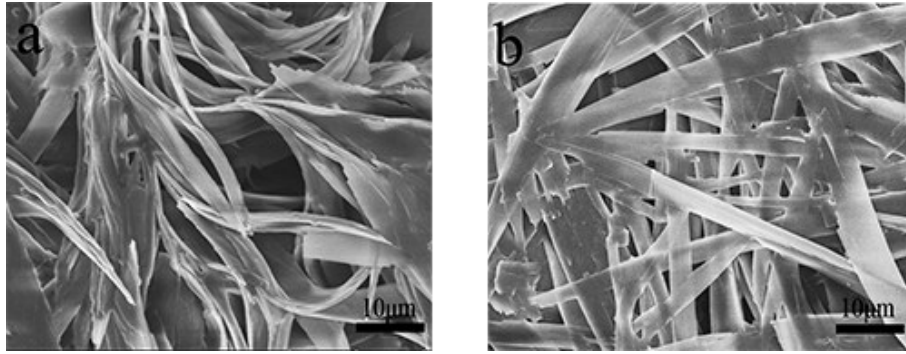

**Fig. S6** SEM images of 4D<sub>16</sub> xerogels obtained from benzene (40 mg/mL, 20 °C) after different annealing time at 58 °C: **(a)** 0 h, **(b)** 10 h.
